# Supplementary material for: Pathways towards high performance Na–O2 batteries: tailoring graphene aerogel cathode porosity & nanostructure
Source: Royal Society of Chemistry journal article supplement (doi:10.1039/c8ta07273f), 2018-01-01
Supplement: c8ta07273f1.pdf [file c8ta07273f1.pdf]

## Supporting Information

### **Pathways Towards High Performance Na-O<sub>2</sub> Batteries: Tailoring Graphene Aerogel Cathode Porosity & Nanostructure**

M. Enterría<sup>1</sup>, C. Botas<sup>1</sup>, J.L. Gómez-Urbano<sup>1</sup>, B. Acebedo<sup>1</sup>, Juan Miguel López del Amo<sup>1</sup>,  
D. Carriazo<sup>1,2</sup>, T. Rojo<sup>1,3</sup>, N. Ortiz-Vitoriano<sup>1,2,\*</sup>

<sup>1</sup>*CIC EnergiGUNE, Álava Technology Park. C/ Albert Einstein 48, 01510 Miñano Spain*

<sup>2</sup>*IKERBASQUE, Basque Foundation for Science, 48013 Bilbao, Spain*

<sup>3</sup>*Departamento de Química Inorgánica, Universidad del País Vasco UPV/EHU, P.O. Box  
664, 48080, Bilbao, Spain*

\*Correspondence to [nortiz@cicenergigune.com](mailto:nortiz@cicenergigune.com)

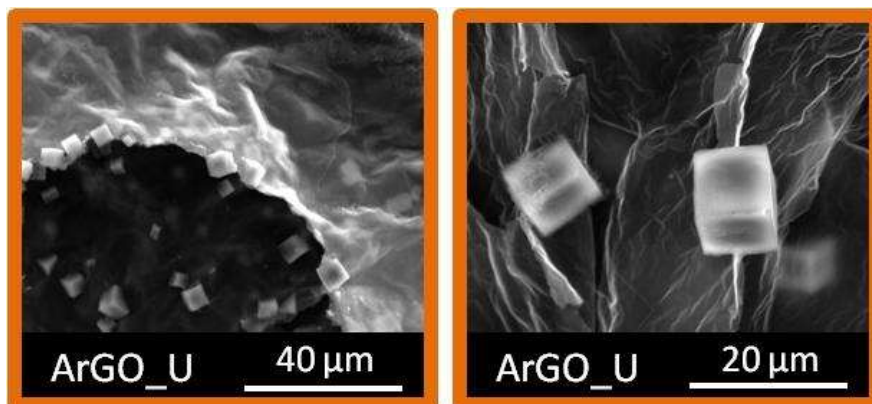

**Fig. S1.** SEM images of galvanostatically discharged ArGO\_U cathode at 100 mAh g<sup>-1</sup> to 1.8 V showing the O<sub>2</sub>/electrode interface.

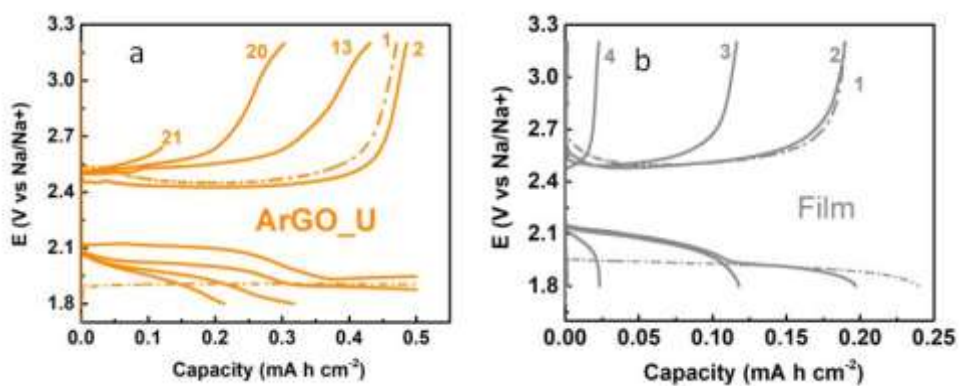

**Fig. S2.** a) Cyclability test for ArGO\_U and (b) Film electrodes at 100 mA/g and 0.5 mAh cm<sup>-2</sup> using 0.1M NaClO<sub>2</sub> in DME as electrolyte.

**Table S1.** Electrochemical Properties of Na-air/O<sub>2</sub> batteries produced by this work and from literatures.

| Air-cathode<br>[loading (mg) and<br>area (cm <sup>2</sup> )]                             | Electrolyte/<br>Environment                                                          | Discharge properties                                                                     |                                                                               |                        | Cycling performance     |                                                                                                                                                                                              |                      |                           |
|------------------------------------------------------------------------------------------|--------------------------------------------------------------------------------------|------------------------------------------------------------------------------------------|-------------------------------------------------------------------------------|------------------------|-------------------------|----------------------------------------------------------------------------------------------------------------------------------------------------------------------------------------------|----------------------|---------------------------|
|                                                                                          |                                                                                      | Capacity                                                                                 | Discharge<br>product                                                          | Morphology             | Voltage<br>range<br>(V) | Cycles                                                                                                                                                                                       | Overpotential<br>(V) | Ref. in the<br>manuscript |
| Graphene nanosheets<br>[unknown]                                                         | 0.25 NaPF <sub>6</sub><br>DME <sup>1</sup>                                           | 9268 mAh g <sup>-1</sup> at<br>200 mA g <sup>-1</sup>                                    | Na <sub>2</sub> O <sub>2</sub>                                                | Film                   | 1.5-4                   | 10 (300 mA g <sup>-1</sup> to<br>1200 mAh g <sup>-1</sup> )                                                                                                                                  | 1.46 - 1.59          | 39                        |
| Nitrogen doped<br>graphene [0.3;0.71 ]                                                   | 0.5 mol dm <sup>-3</sup><br>NaSO <sub>3</sub> CF <sub>3</sub><br>DEGDME <sup>2</sup> | 6000 mAh g <sup>-1</sup> or<br>3.63 mAh cm <sup>-2</sup><br>at 75 mA g <sup>-1</sup>     | Na <sub>2</sub> O <sub>2</sub>                                                | small particles        | 1.8-3.6                 | 3 (75 mA g <sup>-1</sup> to 1150<br>mAh g <sup>-1</sup> )                                                                                                                                    | 0.6                  | 40                        |
| Graphene nanosheets<br>with Pt nanoparticles<br>[unknown]                                | 1M<br>NaClO <sub>4</sub> :PC <sup>3</sup>                                            | 7574 mAh g <sup>-1</sup> at<br>0.1mA cm <sup>-2</sup>                                    | Na <sub>2</sub> CO <sub>3</sub>                                               | Nanomeric<br>particles | 2-3.5                   | 10 (0.1 mA cm <sup>-2</sup> to<br>100 mAh g <sup>-1</sup> )                                                                                                                                  | 1.3                  | 41                        |
| Ag-reduced graphene<br>oxide [0.85 mg cm <sup>-2</sup> ]                                 | 1M NaPF <sub>6</sub><br>TEGDME <sup>3</sup>                                          | 566 mAh g <sup>-1</sup> at<br>0.1mA cm <sup>-2</sup>                                     | NaO <sub>2</sub> ,<br>Na <sub>2</sub> O <sub>2</sub> and<br>Na <sub>2</sub> O | Nanomeric<br>particles | 1.5-4.5                 | 30 (0.2 mA cm <sup>-2</sup> to<br>0.125 mAh cm <sup>-2</sup> )                                                                                                                               | 0.9                  | 42                        |
| Reduced graphene<br>oxide [0.15;0.5]                                                     | 0.25M NaClO <sub>4</sub><br>DME <sup>3</sup>                                         | 40000 mAh g <sup>-1</sup><br>or 12 mAh cm <sup>-2</sup><br>at<br>0.1 mA cm <sup>-2</sup> | NaO <sub>2</sub>                                                              | Cubic<br>particles     | 1.8-2.8                 | 17 (0.1 mA cm <sup>-2</sup> to 1<br>mAh cm <sup>-2</sup> )                                                                                                                                   | 0.4                  | 36                        |
| Micrometer-sized<br>RuO <sub>2</sub> catalyst-coated<br>B-rGO [0.5 mg cm <sup>-2</sup> ] | 1M NaCF <sub>3</sub> SO <sub>3</sub><br>TEGDME <sup>3</sup>                          | 0.5 mAh cm <sup>-2</sup> at<br>0.05mA cm <sup>-2</sup>                                   | NaO <sub>2</sub>                                                              | Cubic<br>particles     | 1.8-4.5                 | 100 (0.05 mA cm <sup>-2</sup> to<br>0.5 mAh cm <sup>-2</sup> )                                                                                                                               | 1                    | 43                        |
| This work [1.5-<br>2.5,0.95]                                                             | 0.1M NaClO <sub>4</sub><br>DME <sup>3</sup>                                          | 3594 mAh g <sup>-1</sup> or<br>6.61 mAh cm <sup>-2</sup><br>at 100 mA g <sup>-1</sup>    | NaO <sub>2</sub>                                                              | Cubic<br>particles     | 1.8-3.2                 | 40 (100 mA g <sup>-1</sup> /<br>0.15-0.25 mA cm <sup>-2</sup> to<br>0.5 mAh cm <sup>-2</sup> )<br>100 (100 mA g <sup>-1</sup> /0.15<br>mA cm <sup>-2</sup> to 0.15<br>mAh cm <sup>-2</sup> ) | 0.26                 | –                         |

<sup>1</sup> dried air

<sup>2</sup> 1atm O<sub>2</sub>

<sup>3</sup> O<sub>2</sub>

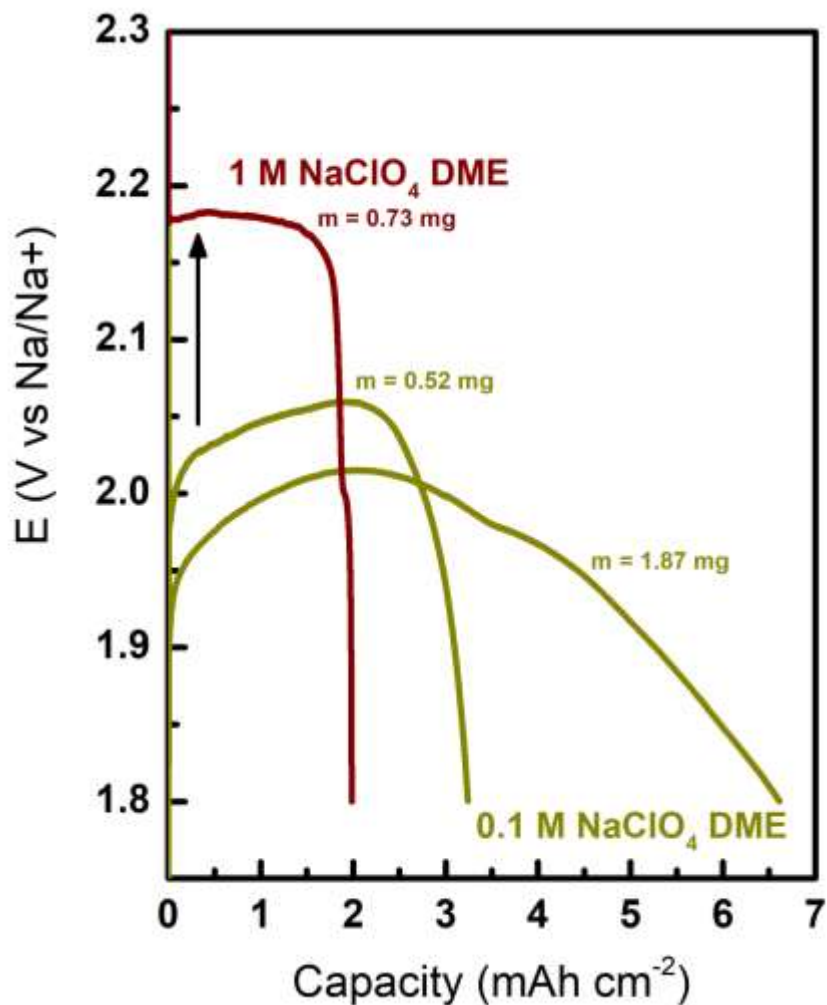

**Fig S3. (a)** Voltage versus capacity of ArGO\_N graphene-based electrodes discharged galvanostatically at 100 mA g<sup>-1</sup> to full capacity in two electrolyte concentrations: 0.1 and 1 M NaClO<sub>4</sub> in DME. The difference in overpotential between 0.1 M and 1 M electrolyte solutions is indicated by an arrow.

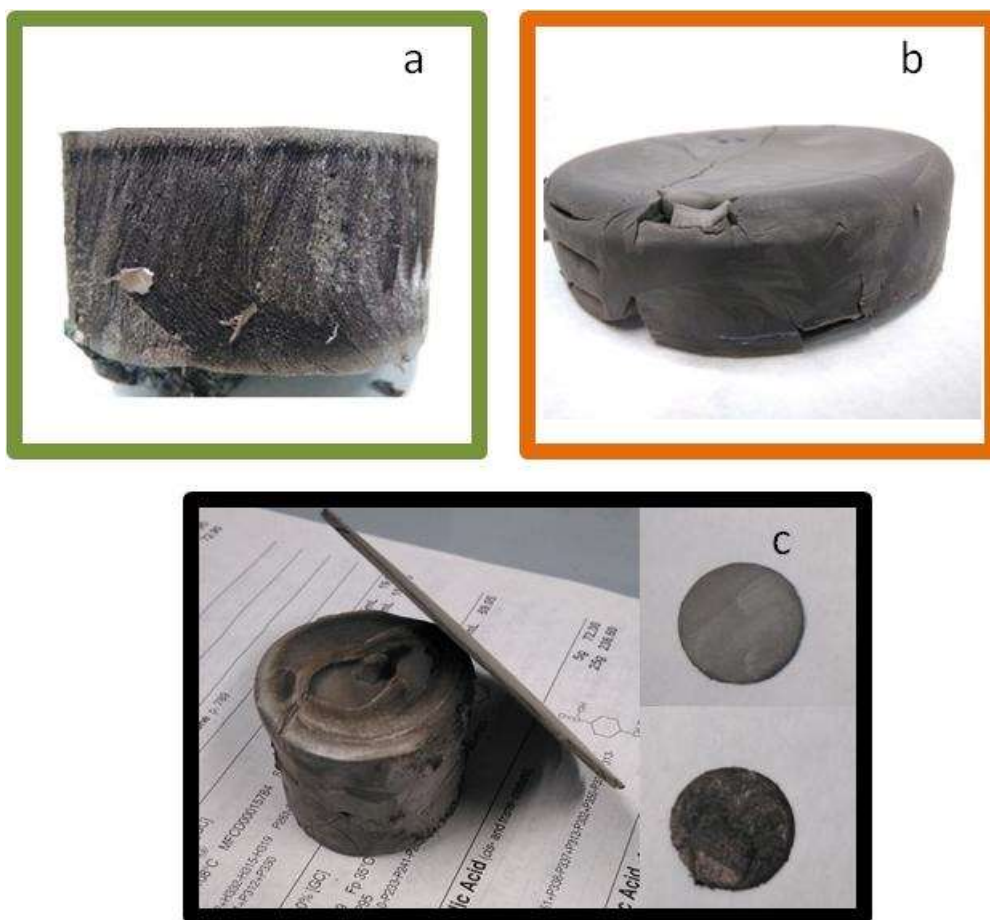

**Fig. S4.** Images of the two prepared cryogels; (a) ArGO\_U and (b) ArGO\_N and (c) some self-standing binder-free electrodes processed from the aerogels.
